# Supplementary material for: Health Beliefs Model and Vaccine Acceptance: Insights from the COVID-19 Pandemic among Non-Medical Personnel in Mwanza, Tanzania
Source: Research Square preprint supplement (doi:10.21203/rs.3.rs-6783060/v1), 2025-06-30
Supplement: Supplementary file 1 [file 3df8e2d27be64bac9e8662d9.pdf]

**Questionnaire developed for the study on:**

**Health Beliefs Model and Vaccine Acceptance: Insights from the COVID-19 Pandemic among Non-Medical Personnel in Mwanza, Tanzania**

**Researchers:** Godfrey W. Mosha, Titus Robert Leeyio, Robert Kitambo and Eveline Thobias Konje

**Section A: Socio-demographic characteristics (circle the responses)**

| Sno. | Questions                         | Response                                                                                                  |
|------|-----------------------------------|-----------------------------------------------------------------------------------------------------------|
| 1    | Name of facility (write the name) |                                                                                                           |
| 2    | Level of health facility          | 1. Dispensary<br>2. Health center<br>3. Tertiary Hospital<br>4. Regional Hospital<br>5. District Hospital |
| 3    | Age in complete years             | -----                                                                                                     |
| 4    | Gender of participant             | 1. Female<br>2. Male                                                                                      |
| 5    | Education level of participant    | 1. Primary and Secondary<br>2. Tertiary (college/university)                                              |

**Section B: Medical/Health history**

| Sno. | Question                                     | Response                                                                                                                                             |
|------|----------------------------------------------|------------------------------------------------------------------------------------------------------------------------------------------------------|
| 1    | Do you have any chronic disease?             | 1. Yes<br>2. No                                                                                                                                      |
| 2    | If yes, tick all that are appropriate to you | 1. Hypertension<br>2. Cancer<br>3. Heart disease<br>4. Diabetes Mellitus<br>5. Asthma<br>6. Kidney failure<br>7. Arthritis<br>8. Stroke<br>9. Others |

**Section C: General health behavior**

| Sno. | Questions                                    | Response        |
|------|----------------------------------------------|-----------------|
| 1    | Do you currently smoke?                      | 1. Yes<br>2. No |
| 2    | Do you exercise regularly?                   | 1. Yes<br>2. No |
| 3    | Ever received a vaccination eg. hep B virus? | 1. Yes<br>2. No |
| 4    | Have you received a covid_19 vaccination?    | 1. Yes<br>2. No |

**Section D: History of covid exposure, attending training on covid prevention**

| Sno. | Questions                                                                                             | Response        |
|------|-------------------------------------------------------------------------------------------------------|-----------------|
| 1    | Did you suffer covid like symptoms during 1 <sup>st</sup> or 2 <sup>nd</sup> or 3 <sup>rd</sup> wave? | 1. Yes<br>2. No |
| 2    | Were you confirmed to be a covid case?                                                                | 1. Yes<br>2. No |

|   |                                                                                                                            |                 |
|---|----------------------------------------------------------------------------------------------------------------------------|-----------------|
| 3 | During pandemic period (3 <sup>rd</sup> wave), did you take care of a confirmed or suspected covid case in your household? | 1. Yes<br>2. No |
|---|----------------------------------------------------------------------------------------------------------------------------|-----------------|

### Section E: Attitude and Acceptability towards vaccine

|   |                                                                                                               |                                                                                                                                                                                                                                                                                                                                                                                                                                                                                                                                                                                                                                                                                                                                                                                                                                                                                                                                                                                   |
|---|---------------------------------------------------------------------------------------------------------------|-----------------------------------------------------------------------------------------------------------------------------------------------------------------------------------------------------------------------------------------------------------------------------------------------------------------------------------------------------------------------------------------------------------------------------------------------------------------------------------------------------------------------------------------------------------------------------------------------------------------------------------------------------------------------------------------------------------------------------------------------------------------------------------------------------------------------------------------------------------------------------------------------------------------------------------------------------------------------------------|
| 1 | A vaccine to protect against COVID-19 is available in Tanzania, would you get vaccinated as soon as possible? | <b>Tick only one response</b><br>1. Definitely yes,<br>2. Possibly yes<br>3. Probably not<br>4. Definitely not<br>5. Do not know                                                                                                                                                                                                                                                                                                                                                                                                                                                                                                                                                                                                                                                                                                                                                                                                                                                  |
| 2 | Are there any reasons you would not get vaccinated to protect against COVID-19?                               | <b>Tick ALL that apply to you</b><br>1. I think the vaccine has been rushed through or has not been adequately tested<br>2. Fear of side effects or that the vaccine will make me sick<br>3. Lack of information about the vaccine or want more information before deciding<br>4. Do not believe it will be effective or do not believe it will protect me against COVID19<br>5. Do not believe it is necessary I think or I have had COVID-19 so I am protected<br>6. I do not believe it is necessary for religious reasons – my religion or my belief will protect me<br>7. I believe the vaccine is part of a conspiracy to harm, track or control people<br>8. I do not trust vaccines generally<br>9. I do not trust the countries or governments producing the vaccines<br>10. If it is said vaccines are mandatory or compulsory, I will not be forced to take it (it is my choice)<br>11. No reasons – I would get the vaccine<br>12. Other (specify)<br>13. Do not know |

### Section F: Vaccination Hesitancy Scale

| Sno. | Statements                                                                                    | Strongly disagree | Disagree | Neutral | Agree | Strongly Agree |
|------|-----------------------------------------------------------------------------------------------|-------------------|----------|---------|-------|----------------|
| 1    | Covid vaccines are important for my health                                                    |                   |          |         |       |                |
| 2    | Covid vaccines are effective                                                                  |                   |          |         |       |                |
| 3    | If I will be vaccinated with covid will be important for the health of others in my community |                   |          |         |       |                |
| 4    | All vaccines offered by the government program in my community are beneficial                 |                   |          |         |       |                |
| 5    | New vaccines including covid vaccine carry more risks than older vaccines                     |                   |          |         |       |                |
| 6    | The information I receive about vaccines from the vaccine program is reliable and trustworthy |                   |          |         |       |                |
| 7    | Getting vaccines is a good way to protect myself from disease                                 |                   |          |         |       |                |
| 8    | I do what my doctor or health care provider recommends about vaccines for my health           |                   |          |         |       |                |

|    |                                                                 |  |  |  |  |  |
|----|-----------------------------------------------------------------|--|--|--|--|--|
| 9  | I am concerned about serious adverse effects of vaccines        |  |  |  |  |  |
| 10 | I do not need vaccines for diseases that are not common anymore |  |  |  |  |  |

**Section G: Health Belief Model and Theory of Planned Behavior Questions**

| Block                    | Statement                                                                                                                                             | Strongly agree | Agree | Neutral | Disagree | Strongly disagree |
|--------------------------|-------------------------------------------------------------------------------------------------------------------------------------------------------|----------------|-------|---------|----------|-------------------|
| Perceived susceptibility | I believe that if I do not get vaccinated, the likelihood of me getting infected with corona will increase                                            | 1              | 2     | 3       | 4        | 5                 |
|                          | I believe that if I do not get vaccinated, the likelihood of my family and relatives getting infected with Corona will increase                       | 1              | 2     | 3       | 4        | 5                 |
| Perceived severity       | Even if I will get infected with COVID-19 I do not think it will cause me significant suffering or complications                                      | 1              | 2     | 3       | 4        | 5                 |
|                          | Even if I get infected with COVID-19, the likelihood of recovering from the disease is very high                                                      | 1              | 2     | 3       | 4        | 5                 |
| Perceived benefits       | I believe that COVID-19 vaccine will have high efficacy in preventing significant suffering and complications of the disease                          | 1              | 2     | 3       | 4        | 5                 |
|                          | I believe that if I get vaccinated against COVID-19 the risk of getting infected with the disease or infecting others will decrease                   | 1              | 2     | 3       | 4        | 5                 |
| Perceived barriers       | Concerned with the efficacy of vaccine available                                                                                                      | 1              | 2     | 3       | 4        | 5                 |
|                          | Concerned with safety of available vaccine                                                                                                            | 1              | 2     | 3       | 4        | 5                 |
|                          | Concerned with halal nature of vaccination                                                                                                            | 1              | 2     | 3       | 4        | 5                 |
|                          | Vaccine program is designed to reduce population                                                                                                      | 1              | 2     | 3       | 4        | 5                 |
| Cues to action           | The chances of me getting vaccinated against COVID-19 will increase if opinion leaders on social media express support for the benefit of the vaccine | 1              | 2     | 3       | 4        | 5                 |
|                          | The chances of me getting vaccinated against COVID-19 will increase if friends and family express support for the benefit of the vaccine              | 1              | 2     | 3       | 4        | 5                 |
|                          | The chances of me getting vaccinated against COVID-19 will increase after receiving complete information                                              | 1              | 2     | 3       | 4        | 5                 |
|                          | The chances of me getting vaccinated against COVID-19 will increase if it will be mandatory                                                           | 1              | 2     | 3       | 4        | 5                 |
|                          | Will get vaccine if it does not cause undue problems to vaccinated people                                                                             | 1              | 2     | 3       | 4        | 5                 |
|                          | I exercise as recommended for my age                                                                                                                  | 1              | 2     | 3       | 4        | 5                 |

|                   |                                                                                                                                               |   |   |   |   |   |
|-------------------|-----------------------------------------------------------------------------------------------------------------------------------------------|---|---|---|---|---|
| Health motivation | I make sure to eat a healthy and varied diet                                                                                                  | 1 | 2 | 3 | 4 | 5 |
| Attitude          | Getting vaccinated is a tedious process that requires time and effort                                                                         | 1 | 2 | 3 | 4 | 5 |
| Subjective norms  | Most of my friends will support the COVID-19 vaccine                                                                                          | 1 | 2 | 3 | 4 | 5 |
|                   | If I tell my friends and relatives that I intend to get vaccinated against COVID-19 when a vaccine is available, they will respond positively | 1 | 2 | 3 | 4 | 5 |
| PBC               | If I am offered a vaccine against COVID-19 for the coming winter, I'm sure I'll be vaccinated, and this decision is entirely up to me.        | 1 | 2 | 3 | 4 | 5 |
| Self-efficacy     | If I take all the necessary precautions (disinfection of hands, etc.) I do not need to be vaccinated against corona                           | 1 | 2 | 3 | 4 | 5 |
